# Supplementary material
Source: PubMed Central journal article supplement (PMC3229195)
Supplement: NIHMS336641-supplement-01.pdf [file NIHMS336641-supplement-01.pdf]

APPENDIX

| Center:                                                                                                                                                                                                                                                                                                                                                                                                                                                                                                                                                                                                                                                                                                                                                                                                                                                                                                                                                                                                                                                                                                                                                                                                                                                                                                                                                                                                                                                                                                                                                                                                                                                                                                                                                                                                                                                                                                                                                                                                                                                                                                             | Alzheimer's Disease Cooperative Study<br>Prevention Instruments Protocol                                                                                                                                                                      |                                                                          |                                                                        |                                                                         |                                                                        |                                                                                                                     |             |  |                                                                                                                 |             |  |                                                                                                                 |             |  |                                                                                                                 |             |
|---------------------------------------------------------------------------------------------------------------------------------------------------------------------------------------------------------------------------------------------------------------------------------------------------------------------------------------------------------------------------------------------------------------------------------------------------------------------------------------------------------------------------------------------------------------------------------------------------------------------------------------------------------------------------------------------------------------------------------------------------------------------------------------------------------------------------------------------------------------------------------------------------------------------------------------------------------------------------------------------------------------------------------------------------------------------------------------------------------------------------------------------------------------------------------------------------------------------------------------------------------------------------------------------------------------------------------------------------------------------------------------------------------------------------------------------------------------------------------------------------------------------------------------------------------------------------------------------------------------------------------------------------------------------------------------------------------------------------------------------------------------------------------------------------------------------------------------------------------------------------------------------------------------------------------------------------------------------------------------------------------------------------------------------------------------------------------------------------------------------|-----------------------------------------------------------------------------------------------------------------------------------------------------------------------------------------------------------------------------------------------|--------------------------------------------------------------------------|------------------------------------------------------------------------|-------------------------------------------------------------------------|------------------------------------------------------------------------|---------------------------------------------------------------------------------------------------------------------|-------------|--|-----------------------------------------------------------------------------------------------------------------|-------------|--|-----------------------------------------------------------------------------------------------------------------|-------------|--|-----------------------------------------------------------------------------------------------------------------|-------------|
| <h2 style="margin: 0;">Resource Use Inventory (Page 1 of 5)</h2> <h3 style="margin: 0;">Baseline Visit</h3>                                                                                                                                                                                                                                                                                                                                                                                                                                                                                                                                                                                                                                                                                                                                                                                                                                                                                                                                                                                                                                                                                                                                                                                                                                                                                                                                                                                                                                                                                                                                                                                                                                                                                                                                                                                                                                                                                                                                                                                                         |                                                                                                                                                                                                                                               |                                                                          |                                                                        |                                                                         |                                                                        |                                                                                                                     |             |  |                                                                                                                 |             |  |                                                                                                                 |             |  |                                                                                                                 |             |
| <div style="display: flex; justify-content: space-between;"> <div style="text-align: center;"> <b>P I</b> </div> <div style="text-align: center;">                 Subject Number<br/> <input style="width: 20px; height: 20px;" type="text"/> <input style="width: 20px; height: 20px;" type="text"/> </div> <div style="text-align: center;">                 Subject Initials<br/> <input style="width: 20px; height: 20px;" type="text"/> <input style="width: 20px; height: 20px;" type="text"/> </div> <div style="text-align: center;">                 Examiner Initials<br/> <input style="width: 20px; height: 20px;" type="text"/> <input style="width: 20px; height: 20px;" type="text"/> </div> <div style="text-align: center;">                 Examination Date<br/> <input style="width: 20px; height: 20px;" type="text"/> <input style="width: 20px; height: 20px;" type="text"/> <input style="width: 20px; height: 20px;" type="text"/> </div> </div> <div style="display: flex; justify-content: space-around; font-size: small; margin-top: 5px;"> <span>Month</span> <span>Day</span> <span>Year</span> </div>                                                                                                                                                                                                                                                                                                                                                                                                                                                                                                                                                                                                                                                                                                                                                                                                                                                                                                                                                                              |                                                                                                                                                                                                                                               |                                                                          |                                                                        |                                                                         |                                                                        |                                                                                                                     |             |  |                                                                                                                 |             |  |                                                                                                                 |             |  |                                                                                                                 |             |
| <b>Instructions:</b>                                                                                                                                                                                                                                                                                                                                                                                                                                                                                                                                                                                                                                                                                                                                                                                                                                                                                                                                                                                                                                                                                                                                                                                                                                                                                                                                                                                                                                                                                                                                                                                                                                                                                                                                                                                                                                                                                                                                                                                                                                                                                                | <b>This questionnaire is designed to assess the health related services used during the past 3 months. Please ask your study partner to participate in answering these questions, so that you can record as much information as possible.</b> |                                                                          |                                                                        |                                                                         |                                                                        |                                                                                                                     |             |  |                                                                                                                 |             |  |                                                                                                                 |             |  |                                                                                                                 |             |
| <p><b>Important:</b> Please be sure to provide an answer for each item. If there were no services used for an item, record "00" in the appropriate box.</p> <p><b>Who worked on this form:</b></p> <p><input type="checkbox"/> Self</p> <p><input type="checkbox"/> Study Partner</p> <p><input type="checkbox"/> Both Subject and Study Partner</p> <p><b>1.</b> In the past 3 months how many times were you admitted to the hospital? If none, enter "00" and skip to question 2.</p> <div style="text-align: right; margin-right: 50px;"> <input style="width: 30px; height: 20px;" type="text"/><br/>                 (Enter "00" if none)             </div> <p>Enter the reason for each admission:</p> <table border="1" style="width: 100%; border-collapse: collapse; margin-top: 10px;"> <thead> <tr> <th style="width: 60%;">REASON FOR ADMISSION</th> <th style="width: 10%;">Number of Nights</th> <th style="width: 30%;">For site use only<br/>Diagnosis Type<br/>(circle all that apply)</th> </tr> </thead> <tbody> <tr> <td>Example: Tonsillectomy</td> <td style="text-align: center;"><input style="width: 15px; height: 15px;" type="text"/> 0 <input style="width: 15px; height: 15px;" type="text"/> 4</td> <td style="text-align: center;">1 2 3 4 5 6</td> </tr> <tr> <td> </td> <td style="text-align: center;"><input style="width: 15px; height: 15px;" type="text"/> <input style="width: 15px; height: 15px;" type="text"/></td> <td style="text-align: center;">1 2 3 4 5 6</td> </tr> <tr> <td> </td> <td style="text-align: center;"><input style="width: 15px; height: 15px;" type="text"/> <input style="width: 15px; height: 15px;" type="text"/></td> <td style="text-align: center;">1 2 3 4 5 6</td> </tr> <tr> <td> </td> <td style="text-align: center;"><input style="width: 15px; height: 15px;" type="text"/> <input style="width: 15px; height: 15px;" type="text"/></td> <td style="text-align: center;">1 2 3 4 5 6</td> </tr> </tbody> </table> <p><input type="checkbox"/> Check here if supplemental form is used to record additional reasons for admission</p> |                                                                                                                                                                                                                                               | REASON FOR ADMISSION                                                     | Number of Nights                                                       | For site use only<br>Diagnosis Type<br>(circle all that apply)          | Example: Tonsillectomy                                                 | <input style="width: 15px; height: 15px;" type="text"/> 0 <input style="width: 15px; height: 15px;" type="text"/> 4 | 1 2 3 4 5 6 |  | <input style="width: 15px; height: 15px;" type="text"/> <input style="width: 15px; height: 15px;" type="text"/> | 1 2 3 4 5 6 |  | <input style="width: 15px; height: 15px;" type="text"/> <input style="width: 15px; height: 15px;" type="text"/> | 1 2 3 4 5 6 |  | <input style="width: 15px; height: 15px;" type="text"/> <input style="width: 15px; height: 15px;" type="text"/> | 1 2 3 4 5 6 |
| REASON FOR ADMISSION                                                                                                                                                                                                                                                                                                                                                                                                                                                                                                                                                                                                                                                                                                                                                                                                                                                                                                                                                                                                                                                                                                                                                                                                                                                                                                                                                                                                                                                                                                                                                                                                                                                                                                                                                                                                                                                                                                                                                                                                                                                                                                | Number of Nights                                                                                                                                                                                                                              | For site use only<br>Diagnosis Type<br>(circle all that apply)           |                                                                        |                                                                         |                                                                        |                                                                                                                     |             |  |                                                                                                                 |             |  |                                                                                                                 |             |  |                                                                                                                 |             |
| Example: Tonsillectomy                                                                                                                                                                                                                                                                                                                                                                                                                                                                                                                                                                                                                                                                                                                                                                                                                                                                                                                                                                                                                                                                                                                                                                                                                                                                                                                                                                                                                                                                                                                                                                                                                                                                                                                                                                                                                                                                                                                                                                                                                                                                                              | <input style="width: 15px; height: 15px;" type="text"/> 0 <input style="width: 15px; height: 15px;" type="text"/> 4                                                                                                                           | 1 2 3 4 5 6                                                              |                                                                        |                                                                         |                                                                        |                                                                                                                     |             |  |                                                                                                                 |             |  |                                                                                                                 |             |  |                                                                                                                 |             |
|                                                                                                                                                                                                                                                                                                                                                                                                                                                                                                                                                                                                                                                                                                                                                                                                                                                                                                                                                                                                                                                                                                                                                                                                                                                                                                                                                                                                                                                                                                                                                                                                                                                                                                                                                                                                                                                                                                                                                                                                                                                                                                                     | <input style="width: 15px; height: 15px;" type="text"/> <input style="width: 15px; height: 15px;" type="text"/>                                                                                                                               | 1 2 3 4 5 6                                                              |                                                                        |                                                                         |                                                                        |                                                                                                                     |             |  |                                                                                                                 |             |  |                                                                                                                 |             |  |                                                                                                                 |             |
|                                                                                                                                                                                                                                                                                                                                                                                                                                                                                                                                                                                                                                                                                                                                                                                                                                                                                                                                                                                                                                                                                                                                                                                                                                                                                                                                                                                                                                                                                                                                                                                                                                                                                                                                                                                                                                                                                                                                                                                                                                                                                                                     | <input style="width: 15px; height: 15px;" type="text"/> <input style="width: 15px; height: 15px;" type="text"/>                                                                                                                               | 1 2 3 4 5 6                                                              |                                                                        |                                                                         |                                                                        |                                                                                                                     |             |  |                                                                                                                 |             |  |                                                                                                                 |             |  |                                                                                                                 |             |
|                                                                                                                                                                                                                                                                                                                                                                                                                                                                                                                                                                                                                                                                                                                                                                                                                                                                                                                                                                                                                                                                                                                                                                                                                                                                                                                                                                                                                                                                                                                                                                                                                                                                                                                                                                                                                                                                                                                                                                                                                                                                                                                     | <input style="width: 15px; height: 15px;" type="text"/> <input style="width: 15px; height: 15px;" type="text"/>                                                                                                                               | 1 2 3 4 5 6                                                              |                                                                        |                                                                         |                                                                        |                                                                                                                     |             |  |                                                                                                                 |             |  |                                                                                                                 |             |  |                                                                                                                 |             |
| <p><b>2.</b> In the past 3 months how many times were you examined by a doctor or nurse? This includes doctor, chiropractor, acupuncturist, emergency room visits, etc. This also includes someone who comes to your home, such as a visiting nurse or physical therapist.</p> <div style="display: flex; justify-content: space-between; align-items: flex-start; margin-top: 10px;"> <div style="width: 60%;"> <table style="width: 100%; border-collapse: collapse;"> <tr> <td style="width: 50%; padding: 5px;">a. Doctor visits <input style="width: 20px; height: 20px;" type="text"/></td> <td style="width: 50%; padding: 5px;">c. Other _____ <input style="width: 20px; height: 20px;" type="text"/></td> </tr> <tr> <td style="padding: 5px;">b. Nurse visits <input style="width: 20px; height: 20px;" type="text"/></td> <td style="padding: 5px;">d. Other _____ <input style="width: 20px; height: 20px;" type="text"/></td> </tr> </table> </div> <div style="width: 35%; text-align: center; padding: 5px;"> <div style="border: 1px solid black; padding: 5px; margin-bottom: 5px;"> <b>TOTAL VISITS</b><br/> <input style="width: 30px; height: 20px;" type="text"/><br/>                     (Enter "00" if none)                 </div> <p style="font-size: small; margin: 0;">↑<br/>Record the total number of visits in the box above</p> </div> </div>                                                                                                                                                                                                                                                                                                                                                                                                                                                                                                                                                                                                                                                                                                                                     |                                                                                                                                                                                                                                               | a. Doctor visits <input style="width: 20px; height: 20px;" type="text"/> | c. Other _____ <input style="width: 20px; height: 20px;" type="text"/> | b. Nurse visits <input style="width: 20px; height: 20px;" type="text"/> | d. Other _____ <input style="width: 20px; height: 20px;" type="text"/> |                                                                                                                     |             |  |                                                                                                                 |             |  |                                                                                                                 |             |  |                                                                                                                 |             |
| a. Doctor visits <input style="width: 20px; height: 20px;" type="text"/>                                                                                                                                                                                                                                                                                                                                                                                                                                                                                                                                                                                                                                                                                                                                                                                                                                                                                                                                                                                                                                                                                                                                                                                                                                                                                                                                                                                                                                                                                                                                                                                                                                                                                                                                                                                                                                                                                                                                                                                                                                            | c. Other _____ <input style="width: 20px; height: 20px;" type="text"/>                                                                                                                                                                        |                                                                          |                                                                        |                                                                         |                                                                        |                                                                                                                     |             |  |                                                                                                                 |             |  |                                                                                                                 |             |  |                                                                                                                 |             |
| b. Nurse visits <input style="width: 20px; height: 20px;" type="text"/>                                                                                                                                                                                                                                                                                                                                                                                                                                                                                                                                                                                                                                                                                                                                                                                                                                                                                                                                                                                                                                                                                                                                                                                                                                                                                                                                                                                                                                                                                                                                                                                                                                                                                                                                                                                                                                                                                                                                                                                                                                             | d. Other _____ <input style="width: 20px; height: 20px;" type="text"/>                                                                                                                                                                        |                                                                          |                                                                        |                                                                         |                                                                        |                                                                                                                     |             |  |                                                                                                                 |             |  |                                                                                                                 |             |  |                                                                                                                 |             |

| Center:                                                                                                                                                                                                                                                                                                                                                                                                                                                                                                                                                                                                                                                                                                                                                                                                                                                                                                                                                                                                                                                                                                                                                                                                                                                                                                                                                                                                                                                                                                                                                                                                                                                                                                                                                                                                                                                                                                                                                                                                                                                                                                                                                                                                                                                                                                                                                                                                                                                                                                                                                                                                                                                                                                                                                                                                                                                                                                                                                                                                                                                                                                                                                                                                                                                                                                                                                                            | Alzheimer's Disease Cooperative Study<br>Prevention Instruments Protocol           |                                                 |                                           |  |          |  |          |             |                                           |             |                                           |                |                                           |                   |                                           |              |                                           |                    |                                           |          |                                           |                                           |                                           |                              |                                           |                      |                                           |                   |                                           |              |                                           |                    |                                           |                                              |                                           |          |                                           |           |                                           |        |                                           |                  |                                           |            |                                           |             |                                           |             |                                           |                                                 |                                           |                       |                                           |              |                                           |             |                                           |       |  |  |  |                                         |  |
|------------------------------------------------------------------------------------------------------------------------------------------------------------------------------------------------------------------------------------------------------------------------------------------------------------------------------------------------------------------------------------------------------------------------------------------------------------------------------------------------------------------------------------------------------------------------------------------------------------------------------------------------------------------------------------------------------------------------------------------------------------------------------------------------------------------------------------------------------------------------------------------------------------------------------------------------------------------------------------------------------------------------------------------------------------------------------------------------------------------------------------------------------------------------------------------------------------------------------------------------------------------------------------------------------------------------------------------------------------------------------------------------------------------------------------------------------------------------------------------------------------------------------------------------------------------------------------------------------------------------------------------------------------------------------------------------------------------------------------------------------------------------------------------------------------------------------------------------------------------------------------------------------------------------------------------------------------------------------------------------------------------------------------------------------------------------------------------------------------------------------------------------------------------------------------------------------------------------------------------------------------------------------------------------------------------------------------------------------------------------------------------------------------------------------------------------------------------------------------------------------------------------------------------------------------------------------------------------------------------------------------------------------------------------------------------------------------------------------------------------------------------------------------------------------------------------------------------------------------------------------------------------------------------------------------------------------------------------------------------------------------------------------------------------------------------------------------------------------------------------------------------------------------------------------------------------------------------------------------------------------------------------------------------------------------------------------------------------------------------------------------|------------------------------------------------------------------------------------|-------------------------------------------------|-------------------------------------------|--|----------|--|----------|-------------|-------------------------------------------|-------------|-------------------------------------------|----------------|-------------------------------------------|-------------------|-------------------------------------------|--------------|-------------------------------------------|--------------------|-------------------------------------------|----------|-------------------------------------------|-------------------------------------------|-------------------------------------------|------------------------------|-------------------------------------------|----------------------|-------------------------------------------|-------------------|-------------------------------------------|--------------|-------------------------------------------|--------------------|-------------------------------------------|----------------------------------------------|-------------------------------------------|----------|-------------------------------------------|-----------|-------------------------------------------|--------|-------------------------------------------|------------------|-------------------------------------------|------------|-------------------------------------------|-------------|-------------------------------------------|-------------|-------------------------------------------|-------------------------------------------------|-------------------------------------------|-----------------------|-------------------------------------------|--------------|-------------------------------------------|-------------|-------------------------------------------|-------|--|--|--|-----------------------------------------|--|
| <b>Resource Use Inventory (Page 2 of 5)</b>                                                                                                                                                                                                                                                                                                                                                                                                                                                                                                                                                                                                                                                                                                                                                                                                                                                                                                                                                                                                                                                                                                                                                                                                                                                                                                                                                                                                                                                                                                                                                                                                                                                                                                                                                                                                                                                                                                                                                                                                                                                                                                                                                                                                                                                                                                                                                                                                                                                                                                                                                                                                                                                                                                                                                                                                                                                                                                                                                                                                                                                                                                                                                                                                                                                                                                                                        |                                                                                    |                                                 |                                           |  |          |  |          |             |                                           |             |                                           |                |                                           |                   |                                           |              |                                           |                    |                                           |          |                                           |                                           |                                           |                              |                                           |                      |                                           |                   |                                           |              |                                           |                    |                                           |                                              |                                           |          |                                           |           |                                           |        |                                           |                  |                                           |            |                                           |             |                                           |             |                                           |                                                 |                                           |                       |                                           |              |                                           |             |                                           |       |  |  |  |                                         |  |
| <b>Baseline Visit</b>                                                                                                                                                                                                                                                                                                                                                                                                                                                                                                                                                                                                                                                                                                                                                                                                                                                                                                                                                                                                                                                                                                                                                                                                                                                                                                                                                                                                                                                                                                                                                                                                                                                                                                                                                                                                                                                                                                                                                                                                                                                                                                                                                                                                                                                                                                                                                                                                                                                                                                                                                                                                                                                                                                                                                                                                                                                                                                                                                                                                                                                                                                                                                                                                                                                                                                                                                              |                                                                                    |                                                 |                                           |  |          |  |          |             |                                           |             |                                           |                |                                           |                   |                                           |              |                                           |                    |                                           |          |                                           |                                           |                                           |                              |                                           |                      |                                           |                   |                                           |              |                                           |                    |                                           |                                              |                                           |          |                                           |           |                                           |        |                                           |                  |                                           |            |                                           |             |                                           |             |                                           |                                                 |                                           |                       |                                           |              |                                           |             |                                           |       |  |  |  |                                         |  |
| Subject Number<br><input type="text" value="P"/> <input type="text" value="I"/> <input type="text"/> <input type="text"/> <input type="text"/> <input type="text"/>                                                                                                                                                                                                                                                                                                                                                                                                                                                                                                                                                                                                                                                                                                                                                                                                                                                                                                                                                                                                                                                                                                                                                                                                                                                                                                                                                                                                                                                                                                                                                                                                                                                                                                                                                                                                                                                                                                                                                                                                                                                                                                                                                                                                                                                                                                                                                                                                                                                                                                                                                                                                                                                                                                                                                                                                                                                                                                                                                                                                                                                                                                                                                                                                                | Subject Initials<br><input type="text"/> <input type="text"/> <input type="text"/> |                                                 |                                           |  |          |  |          |             |                                           |             |                                           |                |                                           |                   |                                           |              |                                           |                    |                                           |          |                                           |                                           |                                           |                              |                                           |                      |                                           |                   |                                           |              |                                           |                    |                                           |                                              |                                           |          |                                           |           |                                           |        |                                           |                  |                                           |            |                                           |             |                                           |             |                                           |                                                 |                                           |                       |                                           |              |                                           |             |                                           |       |  |  |  |                                         |  |
| <p><b>3.</b> For each item below, record the quantity you used or purchased in the past 3 months. Enter "00" if you did not use or purchase any.</p>                                                                                                                                                                                                                                                                                                                                                                                                                                                                                                                                                                                                                                                                                                                                                                                                                                                                                                                                                                                                                                                                                                                                                                                                                                                                                                                                                                                                                                                                                                                                                                                                                                                                                                                                                                                                                                                                                                                                                                                                                                                                                                                                                                                                                                                                                                                                                                                                                                                                                                                                                                                                                                                                                                                                                                                                                                                                                                                                                                                                                                                                                                                                                                                                                               |                                                                                    |                                                 |                                           |  |          |  |          |             |                                           |             |                                           |                |                                           |                   |                                           |              |                                           |                    |                                           |          |                                           |                                           |                                           |                              |                                           |                      |                                           |                   |                                           |              |                                           |                    |                                           |                                              |                                           |          |                                           |           |                                           |        |                                           |                  |                                           |            |                                           |             |                                           |             |                                           |                                                 |                                           |                       |                                           |              |                                           |             |                                           |       |  |  |  |                                         |  |
| <table border="1" style="width: 100%; border-collapse: collapse;"> <thead> <tr style="background-color: #cccccc;"> <th style="width: 45%;"></th> <th style="width: 10%; text-align: center;">Quantity</th> <th style="width: 45%;"></th> <th style="width: 10%; text-align: center;">Quantity</th> </tr> </thead> <tbody> <tr> <td>EYE GLASSES</td> <td style="text-align: center;"><input type="text"/> <input type="text"/></td> <td>TOILET BARS</td> <td style="text-align: center;"><input type="text"/> <input type="text"/></td> </tr> <tr> <td>CONTACT LENSES</td> <td style="text-align: center;"><input type="text"/> <input type="text"/></td> <td>TOILET SEAT/chair</td> <td style="text-align: center;"><input type="text"/> <input type="text"/></td> </tr> <tr> <td>HEARING AIDS</td> <td style="text-align: center;"><input type="text"/> <input type="text"/></td> <td>TUB TRANSFER BENCH</td> <td style="text-align: center;"><input type="text"/> <input type="text"/></td> </tr> <tr> <td>DENTURES</td> <td style="text-align: center;"><input type="text"/> <input type="text"/></td> <td>SHOWER BENCH<br/>chair/stool/transfer seat</td> <td style="text-align: center;"><input type="text"/> <input type="text"/></td> </tr> <tr> <td>JOINT BRACE ankle/wrist/knee</td> <td style="text-align: center;"><input type="text"/> <input type="text"/></td> <td>HANDRAILS FOR SHOWER</td> <td style="text-align: center;"><input type="text"/> <input type="text"/></td> </tr> <tr> <td>ELASTIC STOCKINGS</td> <td style="text-align: center;"><input type="text"/> <input type="text"/></td> <td>HOSPITAL BED</td> <td style="text-align: center;"><input type="text"/> <input type="text"/></td> </tr> <tr> <td>CANE/walking stick</td> <td style="text-align: center;"><input type="text"/> <input type="text"/></td> <td>BED PADS<br/>(record number in last 3 months)</td> <td style="text-align: center;"><input type="text"/> <input type="text"/></td> </tr> <tr> <td>CRUTCHES</td> <td style="text-align: center;"><input type="text"/> <input type="text"/></td> <td>BED ALARM</td> <td style="text-align: center;"><input type="text"/> <input type="text"/></td> </tr> <tr> <td>WALKER</td> <td style="text-align: center;"><input type="text"/> <input type="text"/></td> <td>URINARY CATHETER</td> <td style="text-align: center;"><input type="text"/> <input type="text"/></td> </tr> <tr> <td>RESTRAINTS</td> <td style="text-align: center;"><input type="text"/> <input type="text"/></td> <td>DOOR ALARMS</td> <td style="text-align: center;"><input type="text"/> <input type="text"/></td> </tr> <tr> <td>WHEEL CHAIR</td> <td style="text-align: center;"><input type="text"/> <input type="text"/></td> <td>DIAPERS/pads/briefs<br/>(record number of items)</td> <td style="text-align: center;"><input type="text"/> <input type="text"/></td> </tr> <tr> <td>LIFT CHAIR (ELECTRIC)</td> <td style="text-align: center;"><input type="text"/> <input type="text"/></td> <td>OTHER: _____</td> <td style="text-align: center;"><input type="text"/> <input type="text"/></td> </tr> <tr> <td>SAFETY BARS</td> <td style="text-align: center;"><input type="text"/> <input type="text"/></td> <td>_____</td> <td></td> </tr> <tr> <td></td> <td></td> <td>(please list any other items purchased)</td> <td></td> </tr> </tbody> </table> |                                                                                    |                                                 |                                           |  | Quantity |  | Quantity | EYE GLASSES | <input type="text"/> <input type="text"/> | TOILET BARS | <input type="text"/> <input type="text"/> | CONTACT LENSES | <input type="text"/> <input type="text"/> | TOILET SEAT/chair | <input type="text"/> <input type="text"/> | HEARING AIDS | <input type="text"/> <input type="text"/> | TUB TRANSFER BENCH | <input type="text"/> <input type="text"/> | DENTURES | <input type="text"/> <input type="text"/> | SHOWER BENCH<br>chair/stool/transfer seat | <input type="text"/> <input type="text"/> | JOINT BRACE ankle/wrist/knee | <input type="text"/> <input type="text"/> | HANDRAILS FOR SHOWER | <input type="text"/> <input type="text"/> | ELASTIC STOCKINGS | <input type="text"/> <input type="text"/> | HOSPITAL BED | <input type="text"/> <input type="text"/> | CANE/walking stick | <input type="text"/> <input type="text"/> | BED PADS<br>(record number in last 3 months) | <input type="text"/> <input type="text"/> | CRUTCHES | <input type="text"/> <input type="text"/> | BED ALARM | <input type="text"/> <input type="text"/> | WALKER | <input type="text"/> <input type="text"/> | URINARY CATHETER | <input type="text"/> <input type="text"/> | RESTRAINTS | <input type="text"/> <input type="text"/> | DOOR ALARMS | <input type="text"/> <input type="text"/> | WHEEL CHAIR | <input type="text"/> <input type="text"/> | DIAPERS/pads/briefs<br>(record number of items) | <input type="text"/> <input type="text"/> | LIFT CHAIR (ELECTRIC) | <input type="text"/> <input type="text"/> | OTHER: _____ | <input type="text"/> <input type="text"/> | SAFETY BARS | <input type="text"/> <input type="text"/> | _____ |  |  |  | (please list any other items purchased) |  |
|                                                                                                                                                                                                                                                                                                                                                                                                                                                                                                                                                                                                                                                                                                                                                                                                                                                                                                                                                                                                                                                                                                                                                                                                                                                                                                                                                                                                                                                                                                                                                                                                                                                                                                                                                                                                                                                                                                                                                                                                                                                                                                                                                                                                                                                                                                                                                                                                                                                                                                                                                                                                                                                                                                                                                                                                                                                                                                                                                                                                                                                                                                                                                                                                                                                                                                                                                                                    | Quantity                                                                           |                                                 | Quantity                                  |  |          |  |          |             |                                           |             |                                           |                |                                           |                   |                                           |              |                                           |                    |                                           |          |                                           |                                           |                                           |                              |                                           |                      |                                           |                   |                                           |              |                                           |                    |                                           |                                              |                                           |          |                                           |           |                                           |        |                                           |                  |                                           |            |                                           |             |                                           |             |                                           |                                                 |                                           |                       |                                           |              |                                           |             |                                           |       |  |  |  |                                         |  |
| EYE GLASSES                                                                                                                                                                                                                                                                                                                                                                                                                                                                                                                                                                                                                                                                                                                                                                                                                                                                                                                                                                                                                                                                                                                                                                                                                                                                                                                                                                                                                                                                                                                                                                                                                                                                                                                                                                                                                                                                                                                                                                                                                                                                                                                                                                                                                                                                                                                                                                                                                                                                                                                                                                                                                                                                                                                                                                                                                                                                                                                                                                                                                                                                                                                                                                                                                                                                                                                                                                        | <input type="text"/> <input type="text"/>                                          | TOILET BARS                                     | <input type="text"/> <input type="text"/> |  |          |  |          |             |                                           |             |                                           |                |                                           |                   |                                           |              |                                           |                    |                                           |          |                                           |                                           |                                           |                              |                                           |                      |                                           |                   |                                           |              |                                           |                    |                                           |                                              |                                           |          |                                           |           |                                           |        |                                           |                  |                                           |            |                                           |             |                                           |             |                                           |                                                 |                                           |                       |                                           |              |                                           |             |                                           |       |  |  |  |                                         |  |
| CONTACT LENSES                                                                                                                                                                                                                                                                                                                                                                                                                                                                                                                                                                                                                                                                                                                                                                                                                                                                                                                                                                                                                                                                                                                                                                                                                                                                                                                                                                                                                                                                                                                                                                                                                                                                                                                                                                                                                                                                                                                                                                                                                                                                                                                                                                                                                                                                                                                                                                                                                                                                                                                                                                                                                                                                                                                                                                                                                                                                                                                                                                                                                                                                                                                                                                                                                                                                                                                                                                     | <input type="text"/> <input type="text"/>                                          | TOILET SEAT/chair                               | <input type="text"/> <input type="text"/> |  |          |  |          |             |                                           |             |                                           |                |                                           |                   |                                           |              |                                           |                    |                                           |          |                                           |                                           |                                           |                              |                                           |                      |                                           |                   |                                           |              |                                           |                    |                                           |                                              |                                           |          |                                           |           |                                           |        |                                           |                  |                                           |            |                                           |             |                                           |             |                                           |                                                 |                                           |                       |                                           |              |                                           |             |                                           |       |  |  |  |                                         |  |
| HEARING AIDS                                                                                                                                                                                                                                                                                                                                                                                                                                                                                                                                                                                                                                                                                                                                                                                                                                                                                                                                                                                                                                                                                                                                                                                                                                                                                                                                                                                                                                                                                                                                                                                                                                                                                                                                                                                                                                                                                                                                                                                                                                                                                                                                                                                                                                                                                                                                                                                                                                                                                                                                                                                                                                                                                                                                                                                                                                                                                                                                                                                                                                                                                                                                                                                                                                                                                                                                                                       | <input type="text"/> <input type="text"/>                                          | TUB TRANSFER BENCH                              | <input type="text"/> <input type="text"/> |  |          |  |          |             |                                           |             |                                           |                |                                           |                   |                                           |              |                                           |                    |                                           |          |                                           |                                           |                                           |                              |                                           |                      |                                           |                   |                                           |              |                                           |                    |                                           |                                              |                                           |          |                                           |           |                                           |        |                                           |                  |                                           |            |                                           |             |                                           |             |                                           |                                                 |                                           |                       |                                           |              |                                           |             |                                           |       |  |  |  |                                         |  |
| DENTURES                                                                                                                                                                                                                                                                                                                                                                                                                                                                                                                                                                                                                                                                                                                                                                                                                                                                                                                                                                                                                                                                                                                                                                                                                                                                                                                                                                                                                                                                                                                                                                                                                                                                                                                                                                                                                                                                                                                                                                                                                                                                                                                                                                                                                                                                                                                                                                                                                                                                                                                                                                                                                                                                                                                                                                                                                                                                                                                                                                                                                                                                                                                                                                                                                                                                                                                                                                           | <input type="text"/> <input type="text"/>                                          | SHOWER BENCH<br>chair/stool/transfer seat       | <input type="text"/> <input type="text"/> |  |          |  |          |             |                                           |             |                                           |                |                                           |                   |                                           |              |                                           |                    |                                           |          |                                           |                                           |                                           |                              |                                           |                      |                                           |                   |                                           |              |                                           |                    |                                           |                                              |                                           |          |                                           |           |                                           |        |                                           |                  |                                           |            |                                           |             |                                           |             |                                           |                                                 |                                           |                       |                                           |              |                                           |             |                                           |       |  |  |  |                                         |  |
| JOINT BRACE ankle/wrist/knee                                                                                                                                                                                                                                                                                                                                                                                                                                                                                                                                                                                                                                                                                                                                                                                                                                                                                                                                                                                                                                                                                                                                                                                                                                                                                                                                                                                                                                                                                                                                                                                                                                                                                                                                                                                                                                                                                                                                                                                                                                                                                                                                                                                                                                                                                                                                                                                                                                                                                                                                                                                                                                                                                                                                                                                                                                                                                                                                                                                                                                                                                                                                                                                                                                                                                                                                                       | <input type="text"/> <input type="text"/>                                          | HANDRAILS FOR SHOWER                            | <input type="text"/> <input type="text"/> |  |          |  |          |             |                                           |             |                                           |                |                                           |                   |                                           |              |                                           |                    |                                           |          |                                           |                                           |                                           |                              |                                           |                      |                                           |                   |                                           |              |                                           |                    |                                           |                                              |                                           |          |                                           |           |                                           |        |                                           |                  |                                           |            |                                           |             |                                           |             |                                           |                                                 |                                           |                       |                                           |              |                                           |             |                                           |       |  |  |  |                                         |  |
| ELASTIC STOCKINGS                                                                                                                                                                                                                                                                                                                                                                                                                                                                                                                                                                                                                                                                                                                                                                                                                                                                                                                                                                                                                                                                                                                                                                                                                                                                                                                                                                                                                                                                                                                                                                                                                                                                                                                                                                                                                                                                                                                                                                                                                                                                                                                                                                                                                                                                                                                                                                                                                                                                                                                                                                                                                                                                                                                                                                                                                                                                                                                                                                                                                                                                                                                                                                                                                                                                                                                                                                  | <input type="text"/> <input type="text"/>                                          | HOSPITAL BED                                    | <input type="text"/> <input type="text"/> |  |          |  |          |             |                                           |             |                                           |                |                                           |                   |                                           |              |                                           |                    |                                           |          |                                           |                                           |                                           |                              |                                           |                      |                                           |                   |                                           |              |                                           |                    |                                           |                                              |                                           |          |                                           |           |                                           |        |                                           |                  |                                           |            |                                           |             |                                           |             |                                           |                                                 |                                           |                       |                                           |              |                                           |             |                                           |       |  |  |  |                                         |  |
| CANE/walking stick                                                                                                                                                                                                                                                                                                                                                                                                                                                                                                                                                                                                                                                                                                                                                                                                                                                                                                                                                                                                                                                                                                                                                                                                                                                                                                                                                                                                                                                                                                                                                                                                                                                                                                                                                                                                                                                                                                                                                                                                                                                                                                                                                                                                                                                                                                                                                                                                                                                                                                                                                                                                                                                                                                                                                                                                                                                                                                                                                                                                                                                                                                                                                                                                                                                                                                                                                                 | <input type="text"/> <input type="text"/>                                          | BED PADS<br>(record number in last 3 months)    | <input type="text"/> <input type="text"/> |  |          |  |          |             |                                           |             |                                           |                |                                           |                   |                                           |              |                                           |                    |                                           |          |                                           |                                           |                                           |                              |                                           |                      |                                           |                   |                                           |              |                                           |                    |                                           |                                              |                                           |          |                                           |           |                                           |        |                                           |                  |                                           |            |                                           |             |                                           |             |                                           |                                                 |                                           |                       |                                           |              |                                           |             |                                           |       |  |  |  |                                         |  |
| CRUTCHES                                                                                                                                                                                                                                                                                                                                                                                                                                                                                                                                                                                                                                                                                                                                                                                                                                                                                                                                                                                                                                                                                                                                                                                                                                                                                                                                                                                                                                                                                                                                                                                                                                                                                                                                                                                                                                                                                                                                                                                                                                                                                                                                                                                                                                                                                                                                                                                                                                                                                                                                                                                                                                                                                                                                                                                                                                                                                                                                                                                                                                                                                                                                                                                                                                                                                                                                                                           | <input type="text"/> <input type="text"/>                                          | BED ALARM                                       | <input type="text"/> <input type="text"/> |  |          |  |          |             |                                           |             |                                           |                |                                           |                   |                                           |              |                                           |                    |                                           |          |                                           |                                           |                                           |                              |                                           |                      |                                           |                   |                                           |              |                                           |                    |                                           |                                              |                                           |          |                                           |           |                                           |        |                                           |                  |                                           |            |                                           |             |                                           |             |                                           |                                                 |                                           |                       |                                           |              |                                           |             |                                           |       |  |  |  |                                         |  |
| WALKER                                                                                                                                                                                                                                                                                                                                                                                                                                                                                                                                                                                                                                                                                                                                                                                                                                                                                                                                                                                                                                                                                                                                                                                                                                                                                                                                                                                                                                                                                                                                                                                                                                                                                                                                                                                                                                                                                                                                                                                                                                                                                                                                                                                                                                                                                                                                                                                                                                                                                                                                                                                                                                                                                                                                                                                                                                                                                                                                                                                                                                                                                                                                                                                                                                                                                                                                                                             | <input type="text"/> <input type="text"/>                                          | URINARY CATHETER                                | <input type="text"/> <input type="text"/> |  |          |  |          |             |                                           |             |                                           |                |                                           |                   |                                           |              |                                           |                    |                                           |          |                                           |                                           |                                           |                              |                                           |                      |                                           |                   |                                           |              |                                           |                    |                                           |                                              |                                           |          |                                           |           |                                           |        |                                           |                  |                                           |            |                                           |             |                                           |             |                                           |                                                 |                                           |                       |                                           |              |                                           |             |                                           |       |  |  |  |                                         |  |
| RESTRAINTS                                                                                                                                                                                                                                                                                                                                                                                                                                                                                                                                                                                                                                                                                                                                                                                                                                                                                                                                                                                                                                                                                                                                                                                                                                                                                                                                                                                                                                                                                                                                                                                                                                                                                                                                                                                                                                                                                                                                                                                                                                                                                                                                                                                                                                                                                                                                                                                                                                                                                                                                                                                                                                                                                                                                                                                                                                                                                                                                                                                                                                                                                                                                                                                                                                                                                                                                                                         | <input type="text"/> <input type="text"/>                                          | DOOR ALARMS                                     | <input type="text"/> <input type="text"/> |  |          |  |          |             |                                           |             |                                           |                |                                           |                   |                                           |              |                                           |                    |                                           |          |                                           |                                           |                                           |                              |                                           |                      |                                           |                   |                                           |              |                                           |                    |                                           |                                              |                                           |          |                                           |           |                                           |        |                                           |                  |                                           |            |                                           |             |                                           |             |                                           |                                                 |                                           |                       |                                           |              |                                           |             |                                           |       |  |  |  |                                         |  |
| WHEEL CHAIR                                                                                                                                                                                                                                                                                                                                                                                                                                                                                                                                                                                                                                                                                                                                                                                                                                                                                                                                                                                                                                                                                                                                                                                                                                                                                                                                                                                                                                                                                                                                                                                                                                                                                                                                                                                                                                                                                                                                                                                                                                                                                                                                                                                                                                                                                                                                                                                                                                                                                                                                                                                                                                                                                                                                                                                                                                                                                                                                                                                                                                                                                                                                                                                                                                                                                                                                                                        | <input type="text"/> <input type="text"/>                                          | DIAPERS/pads/briefs<br>(record number of items) | <input type="text"/> <input type="text"/> |  |          |  |          |             |                                           |             |                                           |                |                                           |                   |                                           |              |                                           |                    |                                           |          |                                           |                                           |                                           |                              |                                           |                      |                                           |                   |                                           |              |                                           |                    |                                           |                                              |                                           |          |                                           |           |                                           |        |                                           |                  |                                           |            |                                           |             |                                           |             |                                           |                                                 |                                           |                       |                                           |              |                                           |             |                                           |       |  |  |  |                                         |  |
| LIFT CHAIR (ELECTRIC)                                                                                                                                                                                                                                                                                                                                                                                                                                                                                                                                                                                                                                                                                                                                                                                                                                                                                                                                                                                                                                                                                                                                                                                                                                                                                                                                                                                                                                                                                                                                                                                                                                                                                                                                                                                                                                                                                                                                                                                                                                                                                                                                                                                                                                                                                                                                                                                                                                                                                                                                                                                                                                                                                                                                                                                                                                                                                                                                                                                                                                                                                                                                                                                                                                                                                                                                                              | <input type="text"/> <input type="text"/>                                          | OTHER: _____                                    | <input type="text"/> <input type="text"/> |  |          |  |          |             |                                           |             |                                           |                |                                           |                   |                                           |              |                                           |                    |                                           |          |                                           |                                           |                                           |                              |                                           |                      |                                           |                   |                                           |              |                                           |                    |                                           |                                              |                                           |          |                                           |           |                                           |        |                                           |                  |                                           |            |                                           |             |                                           |             |                                           |                                                 |                                           |                       |                                           |              |                                           |             |                                           |       |  |  |  |                                         |  |
| SAFETY BARS                                                                                                                                                                                                                                                                                                                                                                                                                                                                                                                                                                                                                                                                                                                                                                                                                                                                                                                                                                                                                                                                                                                                                                                                                                                                                                                                                                                                                                                                                                                                                                                                                                                                                                                                                                                                                                                                                                                                                                                                                                                                                                                                                                                                                                                                                                                                                                                                                                                                                                                                                                                                                                                                                                                                                                                                                                                                                                                                                                                                                                                                                                                                                                                                                                                                                                                                                                        | <input type="text"/> <input type="text"/>                                          | _____                                           |                                           |  |          |  |          |             |                                           |             |                                           |                |                                           |                   |                                           |              |                                           |                    |                                           |          |                                           |                                           |                                           |                              |                                           |                      |                                           |                   |                                           |              |                                           |                    |                                           |                                              |                                           |          |                                           |           |                                           |        |                                           |                  |                                           |            |                                           |             |                                           |             |                                           |                                                 |                                           |                       |                                           |              |                                           |             |                                           |       |  |  |  |                                         |  |
|                                                                                                                                                                                                                                                                                                                                                                                                                                                                                                                                                                                                                                                                                                                                                                                                                                                                                                                                                                                                                                                                                                                                                                                                                                                                                                                                                                                                                                                                                                                                                                                                                                                                                                                                                                                                                                                                                                                                                                                                                                                                                                                                                                                                                                                                                                                                                                                                                                                                                                                                                                                                                                                                                                                                                                                                                                                                                                                                                                                                                                                                                                                                                                                                                                                                                                                                                                                    |                                                                                    | (please list any other items purchased)         |                                           |  |          |  |          |             |                                           |             |                                           |                |                                           |                   |                                           |              |                                           |                    |                                           |          |                                           |                                           |                                           |                              |                                           |                      |                                           |                   |                                           |              |                                           |                    |                                           |                                              |                                           |          |                                           |           |                                           |        |                                           |                  |                                           |            |                                           |             |                                           |             |                                           |                                                 |                                           |                       |                                           |              |                                           |             |                                           |       |  |  |  |                                         |  |
| <input type="checkbox"/> Check box if none, and skip to question 4.                                                                                                                                                                                                                                                                                                                                                                                                                                                                                                                                                                                                                                                                                                                                                                                                                                                                                                                                                                                                                                                                                                                                                                                                                                                                                                                                                                                                                                                                                                                                                                                                                                                                                                                                                                                                                                                                                                                                                                                                                                                                                                                                                                                                                                                                                                                                                                                                                                                                                                                                                                                                                                                                                                                                                                                                                                                                                                                                                                                                                                                                                                                                                                                                                                                                                                                |                                                                                    |                                                 |                                           |  |          |  |          |             |                                           |             |                                           |                |                                           |                   |                                           |              |                                           |                    |                                           |          |                                           |                                           |                                           |                              |                                           |                      |                                           |                   |                                           |              |                                           |                    |                                           |                                              |                                           |          |                                           |           |                                           |        |                                           |                  |                                           |            |                                           |             |                                           |             |                                           |                                                 |                                           |                       |                                           |              |                                           |             |                                           |       |  |  |  |                                         |  |

| Center:                                                                                                                                                                                                                                                                                                                                                                                                                                                                                                                                                                                                                                                                                                                                                                                                                                                                                                                                                                                                                                                                                          | Alzheimer's Disease Cooperative Study<br>Prevention Instruments Protocol   |                                       |                                    |                                       |                                                                            |                 |                                                                 |                          |                                                                 |  |                                                                 |
|--------------------------------------------------------------------------------------------------------------------------------------------------------------------------------------------------------------------------------------------------------------------------------------------------------------------------------------------------------------------------------------------------------------------------------------------------------------------------------------------------------------------------------------------------------------------------------------------------------------------------------------------------------------------------------------------------------------------------------------------------------------------------------------------------------------------------------------------------------------------------------------------------------------------------------------------------------------------------------------------------------------------------------------------------------------------------------------------------|----------------------------------------------------------------------------|---------------------------------------|------------------------------------|---------------------------------------|----------------------------------------------------------------------------|-----------------|-----------------------------------------------------------------|--------------------------|-----------------------------------------------------------------|--|-----------------------------------------------------------------|
| <b>Resource Use Inventory (Page 3 of 5)</b>                                                                                                                                                                                                                                                                                                                                                                                                                                                                                                                                                                                                                                                                                                                                                                                                                                                                                                                                                                                                                                                      |                                                                            |                                       |                                    |                                       |                                                                            |                 |                                                                 |                          |                                                                 |  |                                                                 |
| <b>Baseline Visit</b>                                                                                                                                                                                                                                                                                                                                                                                                                                                                                                                                                                                                                                                                                                                                                                                                                                                                                                                                                                                                                                                                            |                                                                            |                                       |                                    |                                       |                                                                            |                 |                                                                 |                          |                                                                 |  |                                                                 |
| Subject Number                                                                                                                                                                                                                                                                                                                                                                                                                                                                                                                                                                                                                                                                                                                                                                                                                                                                                                                                                                                                                                                                                   | Subject Initials                                                           |                                       |                                    |                                       |                                                                            |                 |                                                                 |                          |                                                                 |  |                                                                 |
| <input type="text" value="P"/> <input type="text" value="I"/> <input type="text"/> <input type="text"/> <input type="text"/> <input type="text"/>                                                                                                                                                                                                                                                                                                                                                                                                                                                                                                                                                                                                                                                                                                                                                                                                                                                                                                                                                | <input type="text"/> <input type="text"/> <input type="text"/>             |                                       |                                    |                                       |                                                                            |                 |                                                                 |                          |                                                                 |  |                                                                 |
| <p><b>4. List any <b>outpatient</b> medical tests or procedures, or treatments required by you in the last 3 months (this includes any therapy, oxygen, social services, health education services, dental care, etc.). <b>Do not include inpatient procedures.</b></b></p> <p><input type="checkbox"/> Check box if none, and skip to question 5.</p>                                                                                                                                                                                                                                                                                                                                                                                                                                                                                                                                                                                                                                                                                                                                           |                                                                            |                                       |                                    |                                       |                                                                            |                 |                                                                 |                          |                                                                 |  |                                                                 |
| <table border="1" style="width: 100%; border-collapse: collapse;"> <thead> <tr style="background-color: #e0e0e0;"> <th style="padding: 5px;">MEDICAL TEST OR PROCEDURE FOR SUBJECT</th> <th style="padding: 5px;">Was part or all paid by Insurance?</th> </tr> </thead> <tbody> <tr> <td style="padding: 5px;"><b>Example:</b> Vaccination for polio</td> <td style="padding: 5px;">1 <input checked="" type="checkbox"/> Yes    0 <input type="checkbox"/> No</td> </tr> <tr> <td style="padding: 5px;"> </td> <td style="padding: 5px;">1 <input type="checkbox"/> Yes    0 <input type="checkbox"/> No</td> </tr> <tr> <td style="padding: 5px;"> </td> <td style="padding: 5px;">1 <input type="checkbox"/> Yes    0 <input type="checkbox"/> No</td> </tr> <tr> <td style="padding: 5px;"> </td> <td style="padding: 5px;">1 <input type="checkbox"/> Yes    0 <input type="checkbox"/> No</td> </tr> </tbody> </table>                                                                                                                                                                    |                                                                            | MEDICAL TEST OR PROCEDURE FOR SUBJECT | Was part or all paid by Insurance? | <b>Example:</b> Vaccination for polio | 1 <input checked="" type="checkbox"/> Yes    0 <input type="checkbox"/> No |                 | 1 <input type="checkbox"/> Yes    0 <input type="checkbox"/> No |                          | 1 <input type="checkbox"/> Yes    0 <input type="checkbox"/> No |  | 1 <input type="checkbox"/> Yes    0 <input type="checkbox"/> No |
| MEDICAL TEST OR PROCEDURE FOR SUBJECT                                                                                                                                                                                                                                                                                                                                                                                                                                                                                                                                                                                                                                                                                                                                                                                                                                                                                                                                                                                                                                                            | Was part or all paid by Insurance?                                         |                                       |                                    |                                       |                                                                            |                 |                                                                 |                          |                                                                 |  |                                                                 |
| <b>Example:</b> Vaccination for polio                                                                                                                                                                                                                                                                                                                                                                                                                                                                                                                                                                                                                                                                                                                                                                                                                                                                                                                                                                                                                                                            | 1 <input checked="" type="checkbox"/> Yes    0 <input type="checkbox"/> No |                                       |                                    |                                       |                                                                            |                 |                                                                 |                          |                                                                 |  |                                                                 |
|                                                                                                                                                                                                                                                                                                                                                                                                                                                                                                                                                                                                                                                                                                                                                                                                                                                                                                                                                                                                                                                                                                  | 1 <input type="checkbox"/> Yes    0 <input type="checkbox"/> No            |                                       |                                    |                                       |                                                                            |                 |                                                                 |                          |                                                                 |  |                                                                 |
|                                                                                                                                                                                                                                                                                                                                                                                                                                                                                                                                                                                                                                                                                                                                                                                                                                                                                                                                                                                                                                                                                                  | 1 <input type="checkbox"/> Yes    0 <input type="checkbox"/> No            |                                       |                                    |                                       |                                                                            |                 |                                                                 |                          |                                                                 |  |                                                                 |
|                                                                                                                                                                                                                                                                                                                                                                                                                                                                                                                                                                                                                                                                                                                                                                                                                                                                                                                                                                                                                                                                                                  | 1 <input type="checkbox"/> Yes    0 <input type="checkbox"/> No            |                                       |                                    |                                       |                                                                            |                 |                                                                 |                          |                                                                 |  |                                                                 |
| <p><input type="checkbox"/> Check here if supplemental form is used to record treatments/procedures</p>                                                                                                                                                                                                                                                                                                                                                                                                                                                                                                                                                                                                                                                                                                                                                                                                                                                                                                                                                                                          |                                                                            |                                       |                                    |                                       |                                                                            |                 |                                                                 |                          |                                                                 |  |                                                                 |
| <p><b>5. a) How many nights did you spend in "overnight care" (not including hospital stays) in the past 3 months (e.g., rehabilitation center)? <b>If none</b>, enter "00" and skip to question 6.</b></p> <div style="text-align: right; margin-right: 50px;"> <table border="1" style="border-collapse: collapse;"> <tr> <td style="width: 20px; height: 20px;"></td> <td style="width: 20px; height: 20px;"></td> </tr> </table> <p>(Enter "00" if none)</p> </div> <p>Who paid for the time spent in "overnight care?"</p> <table style="width: 100%; text-align: center; margin: 10px auto;"> <tr style="background-color: #e0e0e0;"> <td style="padding: 5px;"><b>Medicare</b></td> <td style="padding: 5px;"><b>Other Insurance</b></td> <td style="padding: 5px;"><b>You Paid</b></td> </tr> <tr> <td style="padding: 5px;"><input type="checkbox"/></td> <td style="padding: 5px;"><input type="checkbox"/></td> <td style="padding: 5px;"><input type="checkbox"/></td> </tr> </table> <p style="text-align: center; margin-top: 5px;"><i>You may check Yes to all that apply</i></p> |                                                                            |                                       |                                    | <b>Medicare</b>                       | <b>Other Insurance</b>                                                     | <b>You Paid</b> | <input type="checkbox"/>                                        | <input type="checkbox"/> | <input type="checkbox"/>                                        |  |                                                                 |
|                                                                                                                                                                                                                                                                                                                                                                                                                                                                                                                                                                                                                                                                                                                                                                                                                                                                                                                                                                                                                                                                                                  |                                                                            |                                       |                                    |                                       |                                                                            |                 |                                                                 |                          |                                                                 |  |                                                                 |
| <b>Medicare</b>                                                                                                                                                                                                                                                                                                                                                                                                                                                                                                                                                                                                                                                                                                                                                                                                                                                                                                                                                                                                                                                                                  | <b>Other Insurance</b>                                                     | <b>You Paid</b>                       |                                    |                                       |                                                                            |                 |                                                                 |                          |                                                                 |  |                                                                 |
| <input type="checkbox"/>                                                                                                                                                                                                                                                                                                                                                                                                                                                                                                                                                                                                                                                                                                                                                                                                                                                                                                                                                                                                                                                                         | <input type="checkbox"/>                                                   | <input type="checkbox"/>              |                                    |                                       |                                                                            |                 |                                                                 |                          |                                                                 |  |                                                                 |

|                                                                                                                                                                                                                                                                                                                                                                                                                                                                                                                                                                                                                                                                                                                                                                                                                                                                                                                                                                                                                                                                                                                                                                                                                                                                                                                                      |                                                                          |                          |                        |                 |                          |                          |                          |
|--------------------------------------------------------------------------------------------------------------------------------------------------------------------------------------------------------------------------------------------------------------------------------------------------------------------------------------------------------------------------------------------------------------------------------------------------------------------------------------------------------------------------------------------------------------------------------------------------------------------------------------------------------------------------------------------------------------------------------------------------------------------------------------------------------------------------------------------------------------------------------------------------------------------------------------------------------------------------------------------------------------------------------------------------------------------------------------------------------------------------------------------------------------------------------------------------------------------------------------------------------------------------------------------------------------------------------------|--------------------------------------------------------------------------|--------------------------|------------------------|-----------------|--------------------------|--------------------------|--------------------------|
| Center:                                                                                                                                                                                                                                                                                                                                                                                                                                                                                                                                                                                                                                                                                                                                                                                                                                                                                                                                                                                                                                                                                                                                                                                                                                                                                                                              | Alzheimer's Disease Cooperative Study<br>Prevention Instruments Protocol |                          |                        |                 |                          |                          |                          |
| <h2 style="margin: 0;">Resource Use Inventory (Page 4 of 5)</h2> <h3 style="margin: 0;">Baseline Visit</h3>                                                                                                                                                                                                                                                                                                                                                                                                                                                                                                                                                                                                                                                                                                                                                                                                                                                                                                                                                                                                                                                                                                                                                                                                                          |                                                                          |                          |                        |                 |                          |                          |                          |
| <div style="display: flex; justify-content: space-around; align-items: center;"> <div style="text-align: center;"> <p>Subject Number</p> <div style="display: flex; align-items: center;"> <div style="border: 1px solid black; padding: 2px 5px; margin-right: 5px;">P</div> <div style="border: 1px solid black; padding: 2px 5px; margin-right: 5px;">I</div> <div style="border: 1px solid black; width: 20px; height: 20px; margin-right: 5px;"></div> <div style="border: 1px solid black; width: 20px; height: 20px; margin-right: 5px;"></div> <div style="border: 1px solid black; width: 20px; height: 20px; margin-right: 5px;"></div> <div style="border: 1px solid black; width: 20px; height: 20px;"></div> </div> </div> <div style="text-align: center;"> <p>Subject Initials</p> <div style="border: 1px solid black; width: 30px; height: 20px;"></div> </div> </div>                                                                                                                                                                                                                                                                                                                                                                                                                                              |                                                                          |                          |                        |                 |                          |                          |                          |
| <p><b>6. a)</b> In the past 3 months, how many days did a home health aide, attendant, companion, or any other paid individual look after you? <b><i>If None</i></b>, enter "00" and skip to question 7. <span style="float: right; border: 1px solid black; padding: 2px 10px;"> <div style="border: 1px solid black; width: 20px; height: 20px; display: inline-block;"></div><br/>                     (Enter "00" if none)                 </span></p> <p><b>b)</b> For each day included in 6a, how many hours per day on average? <span style="float: right; border: 1px solid black; padding: 2px 10px;"> <div style="border: 1px solid black; width: 20px; height: 20px; display: inline-block;"></div><br/>                     (Enter "00" if none)                 </span></p> <p>Who paid for the home health aide, attendant, companion, or any other paid individual?</p> <table style="width: 100%; text-align: center; margin: 10px 0;"> <tr> <td style="width: 33%;"><b>Medicare</b></td> <td style="width: 33%;"><b>Other Insurance</b></td> <td style="width: 33%;"><b>You Paid</b></td> </tr> <tr> <td><input type="checkbox"/></td> <td><input type="checkbox"/></td> <td><input type="checkbox"/></td> </tr> </table> <p style="text-align: center; margin: 0;"><i>You may check Yes to all that apply</i></p> |                                                                          | <b>Medicare</b>          | <b>Other Insurance</b> | <b>You Paid</b> | <input type="checkbox"/> | <input type="checkbox"/> | <input type="checkbox"/> |
| <b>Medicare</b>                                                                                                                                                                                                                                                                                                                                                                                                                                                                                                                                                                                                                                                                                                                                                                                                                                                                                                                                                                                                                                                                                                                                                                                                                                                                                                                      | <b>Other Insurance</b>                                                   | <b>You Paid</b>          |                        |                 |                          |                          |                          |
| <input type="checkbox"/>                                                                                                                                                                                                                                                                                                                                                                                                                                                                                                                                                                                                                                                                                                                                                                                                                                                                                                                                                                                                                                                                                                                                                                                                                                                                                                             | <input type="checkbox"/>                                                 | <input type="checkbox"/> |                        |                 |                          |                          |                          |
| <p><i>These questions refer to how much assistance you receive from any non-paid help, such as other family members, friends or volunteers. <b>Use the past 3 months to estimate.</b></i></p>                                                                                                                                                                                                                                                                                                                                                                                                                                                                                                                                                                                                                                                                                                                                                                                                                                                                                                                                                                                                                                                                                                                                        |                                                                          |                          |                        |                 |                          |                          |                          |
| <p><b>7. a)</b> How many hours a week did helper(s) spend with you (assisting with things such as getting the phone or the door, getting around, or fetching things)? <span style="float: right; border: 1px solid black; padding: 2px 10px;"> <div style="border: 1px solid black; width: 20px; height: 20px; display: inline-block;"></div><br/>                     (Enter "00" if none)                 </span></p> <p><b>b)</b> How many hours a week did helper(s) spend with you on basic tasks such as eating, dressing or personal care (bathing, using toilet, brushing hair, etc.)? <span style="float: right; border: 1px solid black; padding: 2px 10px;"> <div style="border: 1px solid black; width: 20px; height: 20px; display: inline-block;"></div><br/>                     (Enter "00" if none)                 </span></p> <p><b>c)</b> How many hours a week did helper(s) spend helping you with activities such as shopping, chores, personal business, transportation, or social activities? <span style="float: right; border: 1px solid black; padding: 2px 10px;"> <div style="border: 1px solid black; width: 20px; height: 20px; display: inline-block;"></div><br/>                     (Enter "00" if none)                 </span></p>                                                             |                                                                          |                          |                        |                 |                          |                          |                          |

Center: \_\_\_\_\_ Alzheimer's Disease Cooperative Study  
Prevention Instruments Protocol

## Resource Use Inventory (Page 5 of 5)

### Baseline Visit

Subject Number      Subject Initials

P
I

**8. Do you receive non-paid help with the following activities:**  
 ▶ If you check Yes for any activity, record the number of hours help you receive.

|                                     | Yes<br>(1)               | No<br>(0)                | Average # of<br>hours/week                                                                                                                                                                        | Who provides the help?<br>(You may check all that apply) |       |          |        |           |       |
|-------------------------------------|--------------------------|--------------------------|---------------------------------------------------------------------------------------------------------------------------------------------------------------------------------------------------|----------------------------------------------------------|-------|----------|--------|-----------|-------|
|                                     |                          |                          |                                                                                                                                                                                                   | spouse                                                   | child | relative | friend | volunteer | other |
| shopping                            | <input type="checkbox"/> | <input type="checkbox"/> | <span style="border: 1px solid black; display: inline-block; width: 20px; height: 20px;"></span> <span style="border: 1px solid black; display: inline-block; width: 20px; height: 20px;"></span> |                                                          |       |          |        |           |       |
| cleaning                            | <input type="checkbox"/> | <input type="checkbox"/> | <span style="border: 1px solid black; display: inline-block; width: 20px; height: 20px;"></span> <span style="border: 1px solid black; display: inline-block; width: 20px; height: 20px;"></span> |                                                          |       |          |        |           |       |
| laundry                             | <input type="checkbox"/> | <input type="checkbox"/> | <span style="border: 1px solid black; display: inline-block; width: 20px; height: 20px;"></span> <span style="border: 1px solid black; display: inline-block; width: 20px; height: 20px;"></span> |                                                          |       |          |        |           |       |
| meal preparation                    | <input type="checkbox"/> | <input type="checkbox"/> | <span style="border: 1px solid black; display: inline-block; width: 20px; height: 20px;"></span> <span style="border: 1px solid black; display: inline-block; width: 20px; height: 20px;"></span> |                                                          |       |          |        |           |       |
| transportation                      | <input type="checkbox"/> | <input type="checkbox"/> | <span style="border: 1px solid black; display: inline-block; width: 20px; height: 20px;"></span> <span style="border: 1px solid black; display: inline-block; width: 20px; height: 20px;"></span> |                                                          |       |          |        |           |       |
| personal finances                   | <input type="checkbox"/> | <input type="checkbox"/> | <span style="border: 1px solid black; display: inline-block; width: 20px; height: 20px;"></span> <span style="border: 1px solid black; display: inline-block; width: 20px; height: 20px;"></span> |                                                          |       |          |        |           |       |
| dressings                           | <input type="checkbox"/> | <input type="checkbox"/> | <span style="border: 1px solid black; display: inline-block; width: 20px; height: 20px;"></span> <span style="border: 1px solid black; display: inline-block; width: 20px; height: 20px;"></span> |                                                          |       |          |        |           |       |
| grooming (toileting, bathing, etc.) | <input type="checkbox"/> | <input type="checkbox"/> | <span style="border: 1px solid black; display: inline-block; width: 20px; height: 20px;"></span> <span style="border: 1px solid black; display: inline-block; width: 20px; height: 20px;"></span> |                                                          |       |          |        |           |       |

**9a. Do you do volunteer work?**  
 Yes  No   
 → If yes, how many hours per week

**9b. Are you engaged in paid employment?**  
 Yes  No   
 → If yes, how many hours per week

**9c. In the past 3 months, have you lost time in volunteer work or paid employment due to health reasons?**  
 Yes  No   
 → If yes, how many hours per week
